# Supplementary material for: Separate Compartments for Chromosome Entrapment and DNA Binding during SMC translocation
Source: bioRxiv or medRxiv preprint supplement (doi:10.1101/495820), 2018-12-13
Supplement: Supplementary file [file media-1.pdf]

A

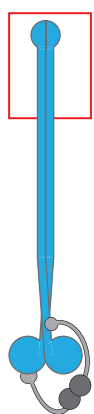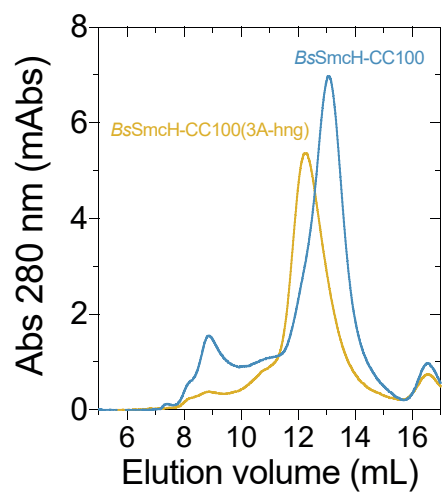

B

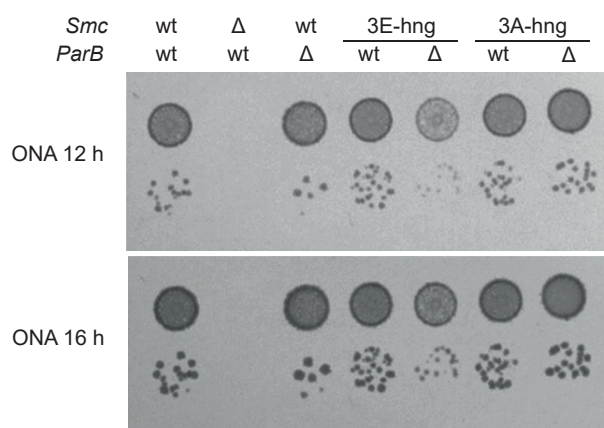

Figure S1

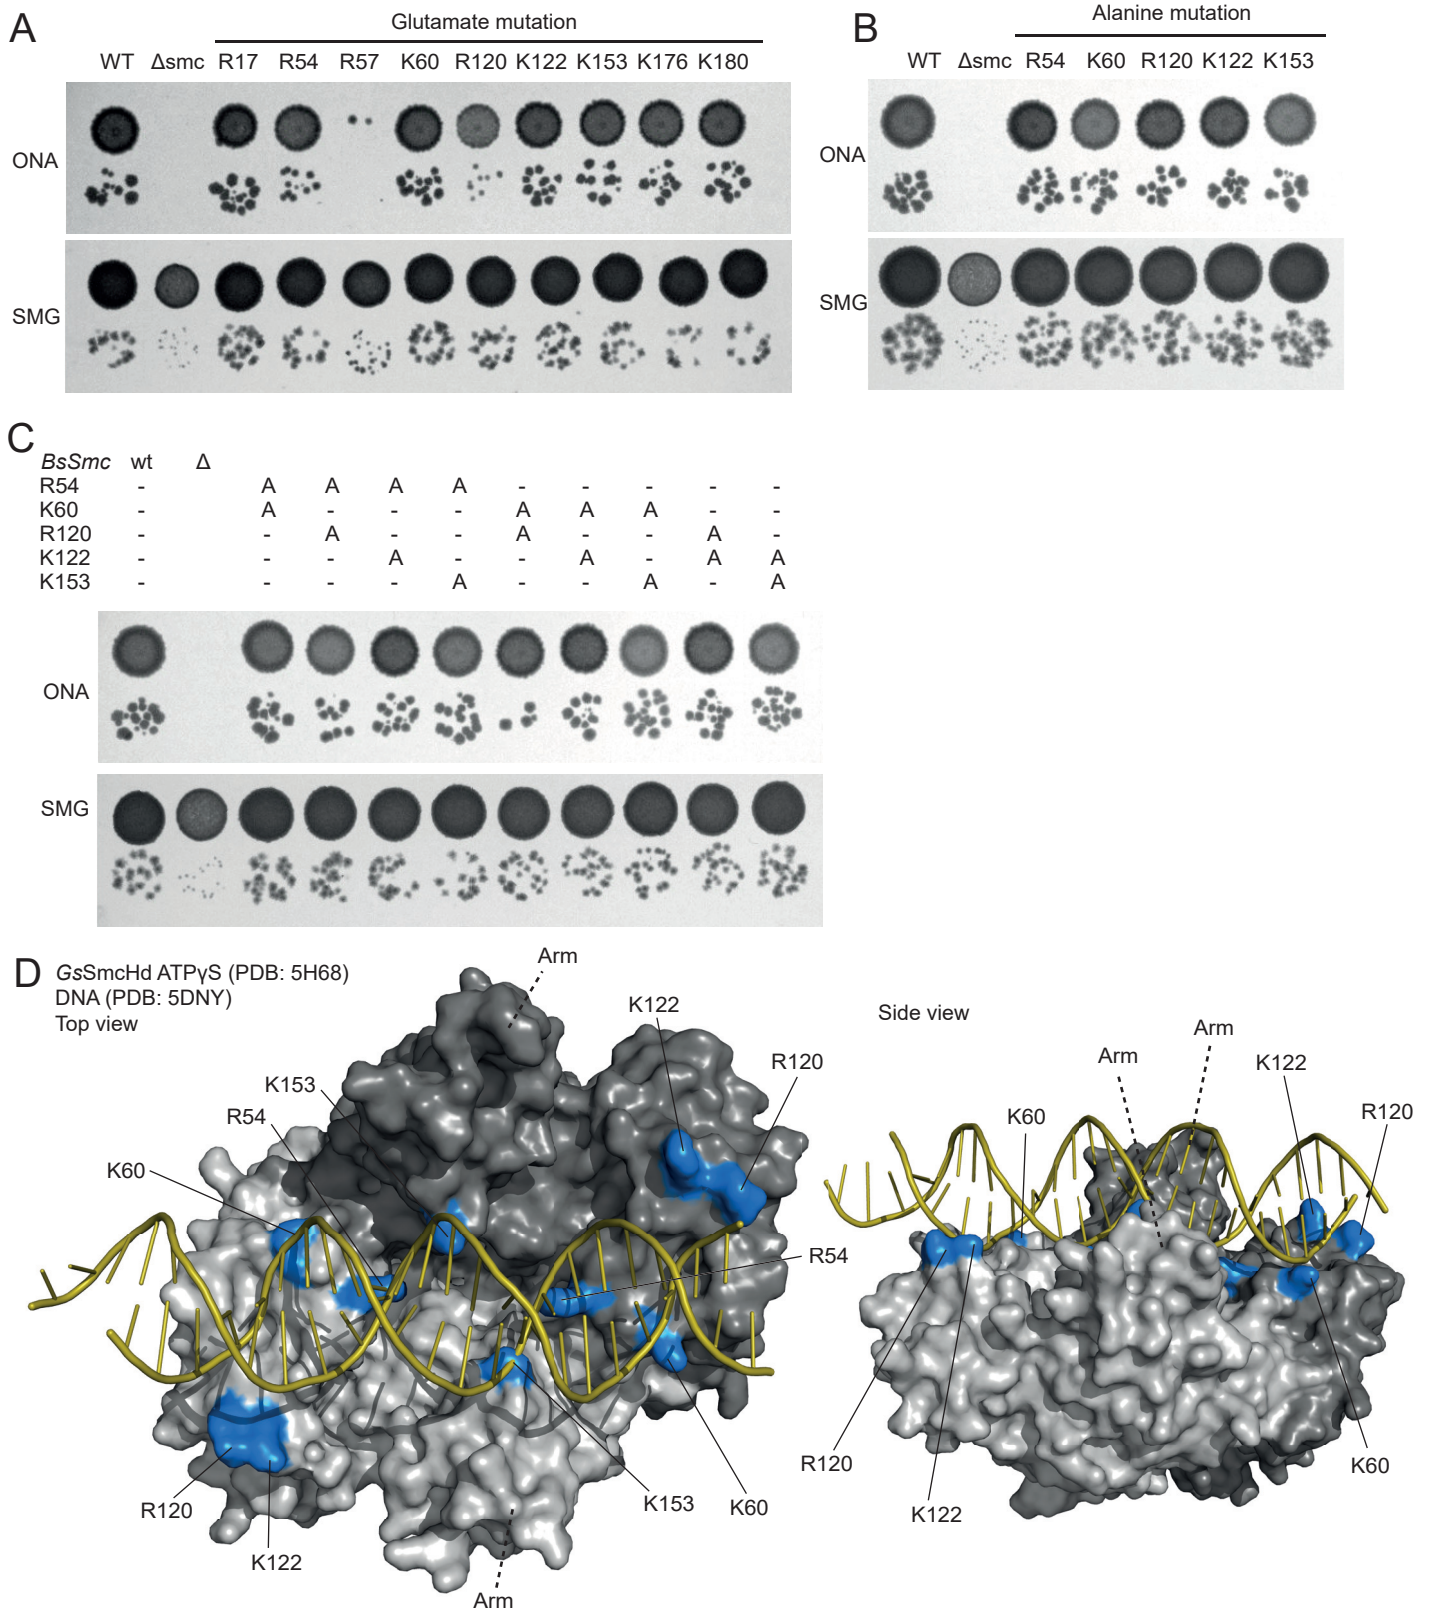

**Figure S2**

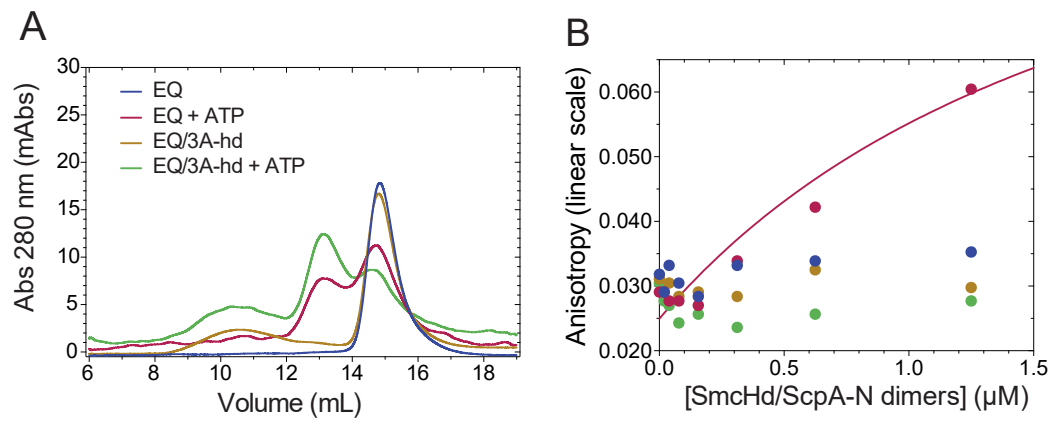

**Figure S3**

**A**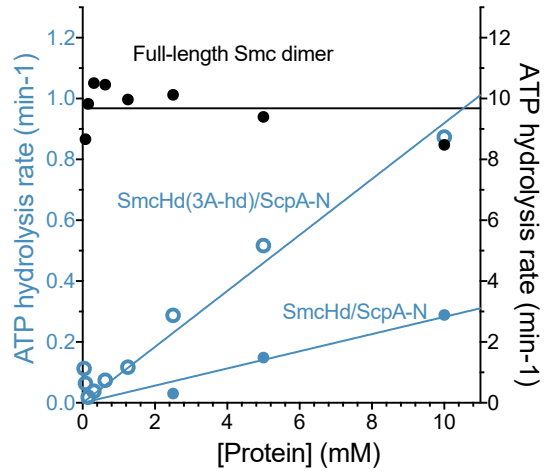**B**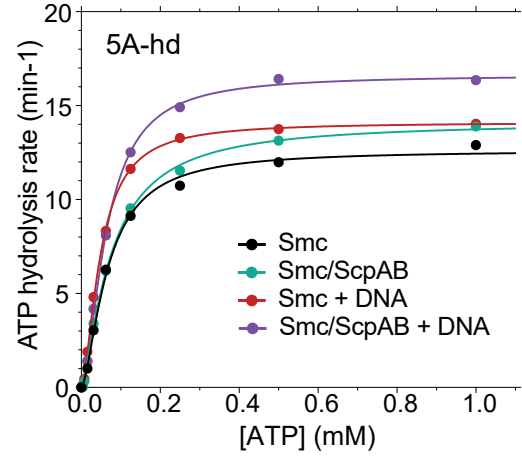**Figure S4**

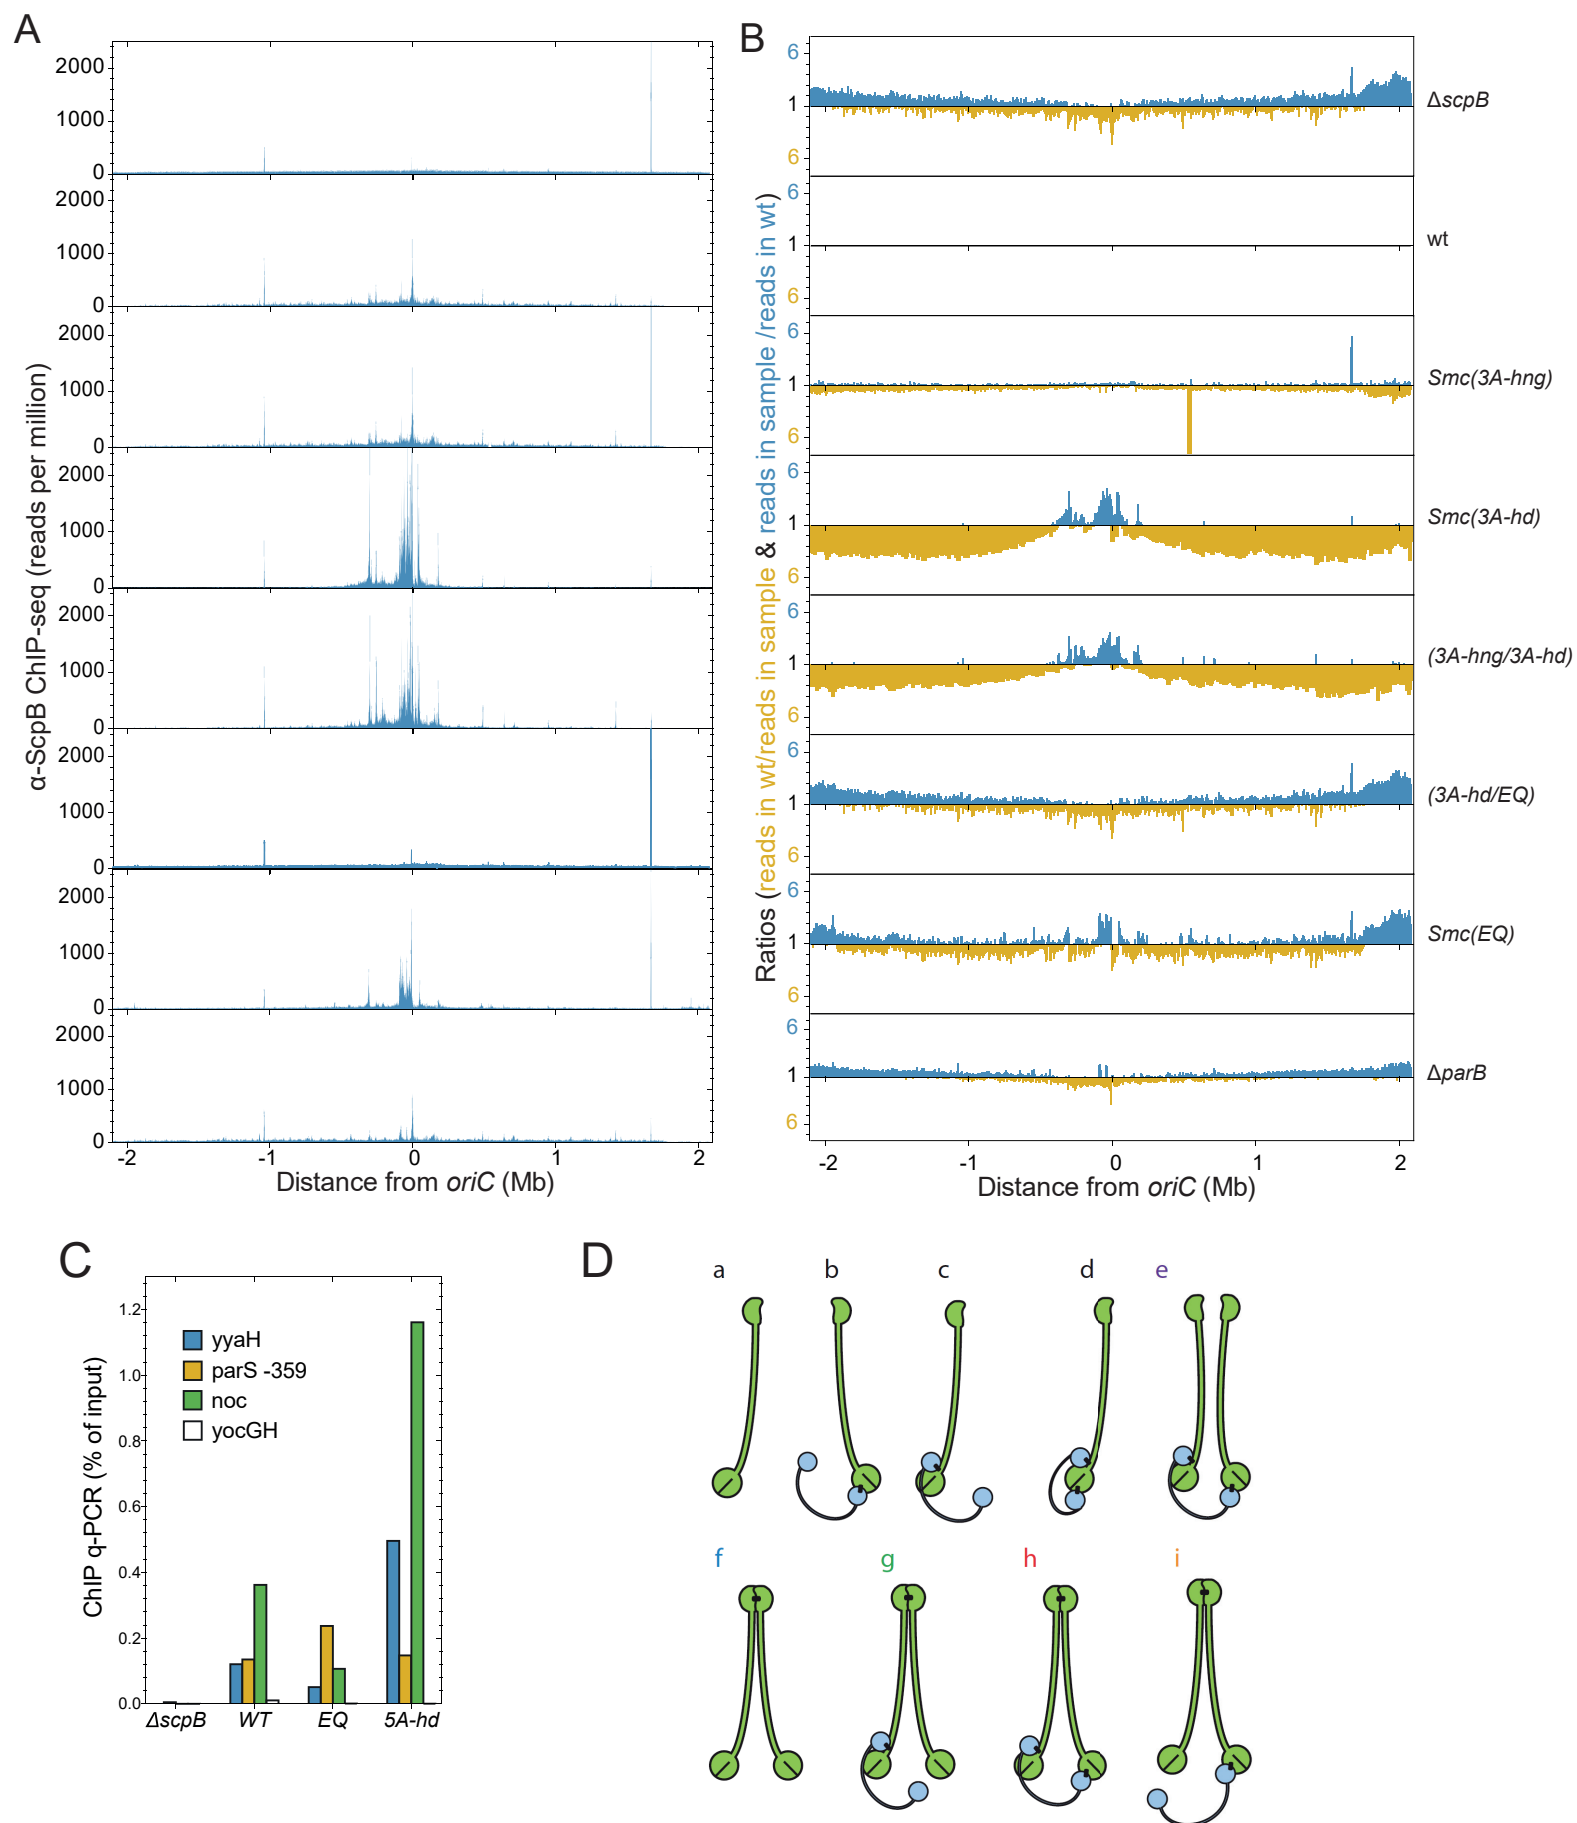

**Figure S5**

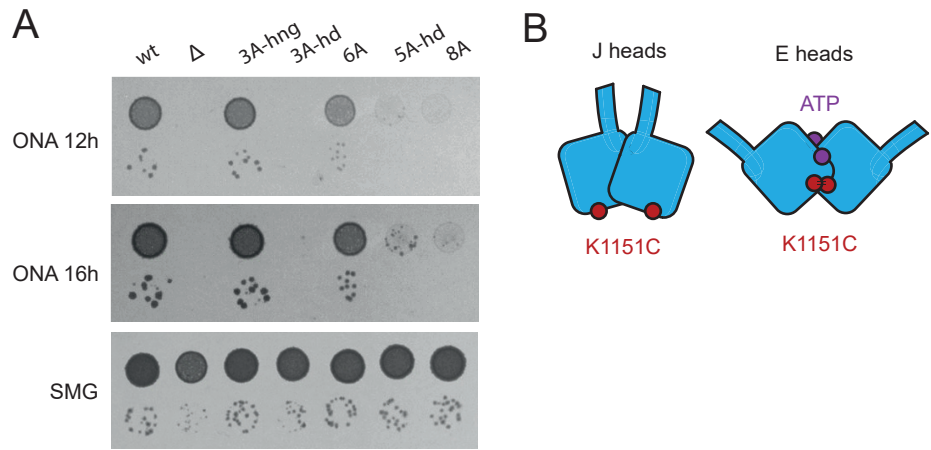

**Figure S6**

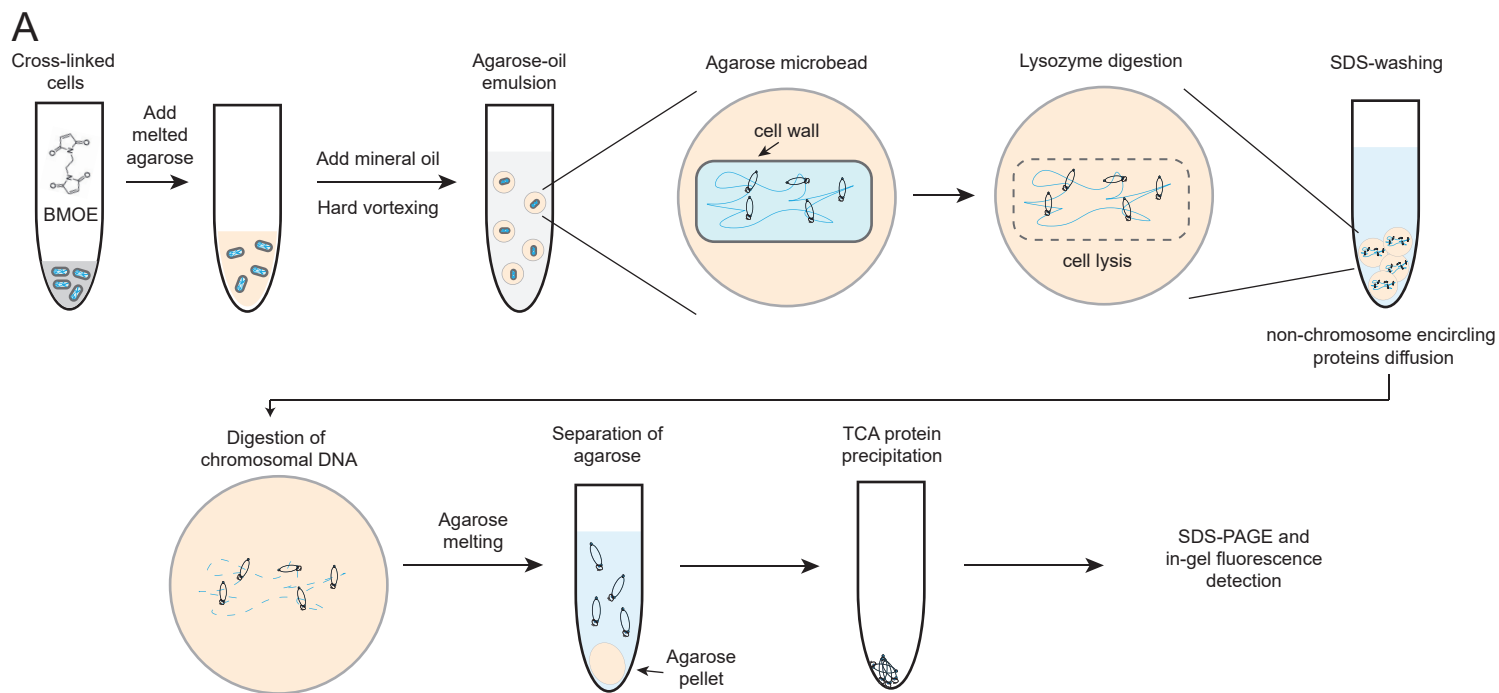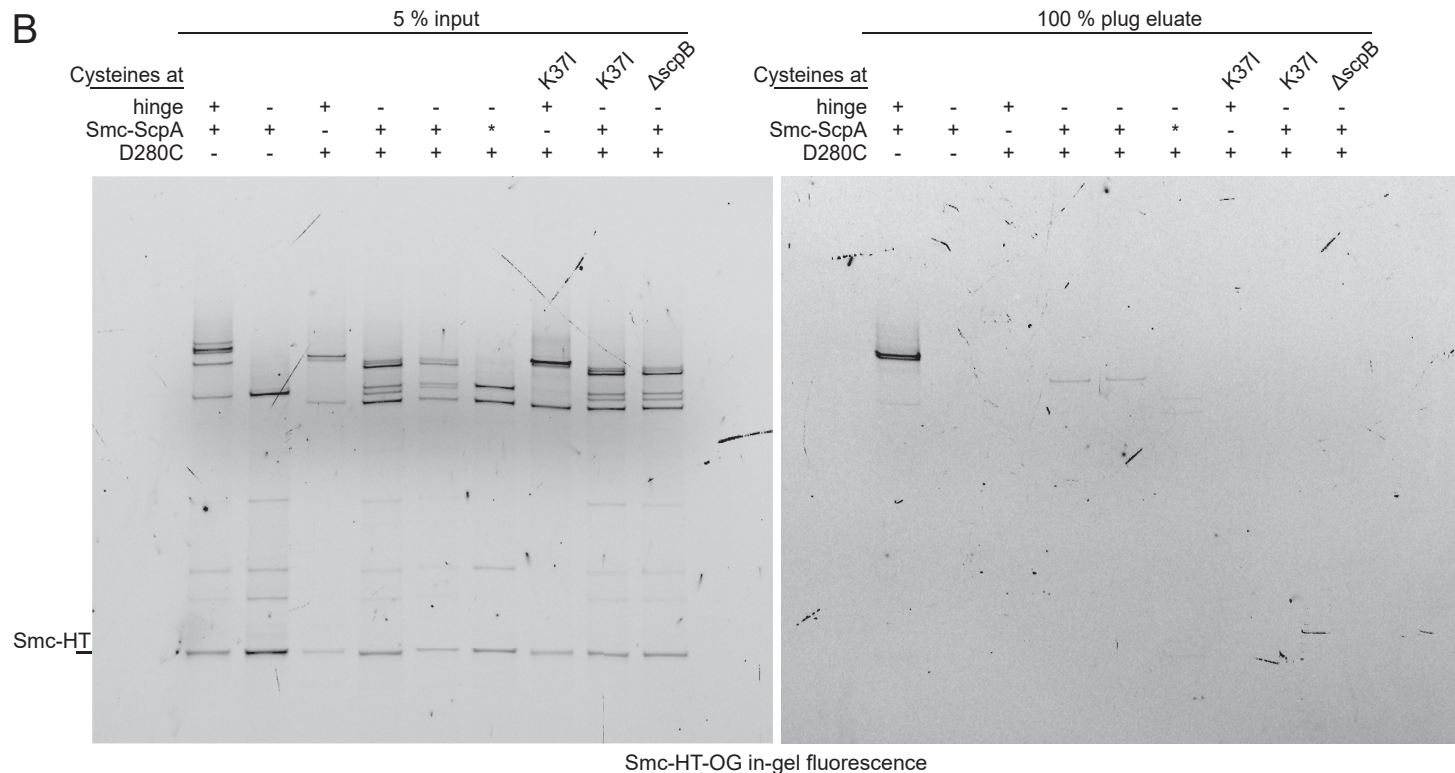

**Figure S7**
